# Supplementary material
Source: publisher figshare collection journal article supplement (https://acs.figshare.com/ndownloader/files/10283118)
Supplement: Supplementary file 1 [file 10283118]

# Effect of Surface Chemistry and Associated Protein Corona on the Long-Term Biodegradation of Iron Oxide Nanoparticles *In Vivo*

*Grazyna Stepień,<sup>1,#</sup> María Moros,<sup>1,2,#,\*</sup> Marta Pérez-Hernández,<sup>1,3</sup> Marta Monge,<sup>4,5</sup> Lucía Gutiérrez,<sup>1</sup> Raluca M. Fratila,<sup>6</sup> Marcelo de las Heras,<sup>7</sup> Sebastián Menao Guillén,<sup>8</sup> Juan José Puente Lantarote,<sup>8</sup> Conxita Solans,<sup>4</sup> Julian Pardo,<sup>1,3,9</sup> and Jesús Martínez de la Fuente.<sup>6,10,\*</sup>*

1-Institute of Nanoscience of Aragon (INA), University of Zaragoza, 50018 Zaragoza, Spain

2- Institute of Applied Sciences and Intelligent Systems-CNR, Via Campi Flegrei, 34, 80078, Pozzuoli, Italy

3- Aragón Health Research Institute (IIS Aragón), Biomedical Research Centre of Aragón (CIBA), 50009 Zaragoza, Spain

4- Institute of Advanced Chemistry of Catalonia (IQAC-CSIC) and CIBER in Bioengineering, Biomaterials and Nanomedicine (CIBER-BBN), Jordi Girona 18-26, Barcelona 08034

5- Department of Pharmacy and Pharmaceutical Technology and Physical Chemistry, University of Barcelona, Av/Joan XXIII s/n, 08028 Barcelona, Spain

6- Aragon Materials Science Institute (ICMA), CSIC-University of Zaragoza and CIBER-BBN, C/Pedro Cerbuna 12, 50009 Zaragoza, Spain

7-Department of Animal Pathology, Veterinary Faculty, University of Zaragoza, 50009 Zaragoza, Spain

8-Department of Clinical Biochemistry. H.C.U. Lozano Blesa, Zaragoza 50009, Spain.

9- ARAID foundation, 50018 Zaragoza, Spain

10-Institute of NanoBiomedicine and Engineering, Shanghai Jiao Tong University, Dongchuan Road 800, 200240 Shanghai, PR China

# Equal contribution

\* Corresponding authors

## IONPs synthesis and functionalization

Monodisperse iron oxide NPs of  $11.6 \pm 1.3$  nm diameter were synthesized following the seed-mediated growth protocol described by Sun et al.<sup>1</sup> First,  $7.8 \pm 0.7$  nm NP seeds were synthesized by mixing and stirring under a flow of argon Iron (III) acetylacetonate  $\text{Fe}(\text{acac})_3$  (1 eq, 2.01 mmol, 0.71 g), 1,2-hexadecanediol (4.5 eq, 9.98 mmol, 2.58 g), oleic acid (2.8 eq, 5.65 mmol, 1.774 g) and oleylamine (2.1 eq, 4.22 mmol, 1.626 g) solubilized in 40 mL benzyl ether (50 mM with respect to  $\text{Fe}(\text{acac})_3$ ). The mixture was heated to 200 °C (at a heating rate of 180 °C/h), maintained at 200 °C for 2 h and then heated to reflux (305 °C, heating speed 10 °C/min) and maintained for 1 h. After cooling down the NPs, they were subsequently washed four times with ethanol, and re-dispersed in hexane. These NPs were used as seeds to obtain 12 nm NPs by mixing and stirring under a flow of argon the following chemicals:  $\text{Fe}(\text{acac})_3$  (1 eq, 4.02 mmol, 1.42 g), 1,2-hexadecanediol (4.5 eq, 19.97 mmol, 5.16 g), oleic acid (0.7 eq, 3.12 mmol, 0.881 g), oleylamine (0.5 eq, 3.06 mmol, 0.818 g) and 7 nm NPs seeds (40 mg Fe) solubilized in benzyl ether (100 mM with respect to  $\text{Fe}(\text{acac})_3$ ). The mixture was heated up to 100 °C for 30 min to evaporate the excess hexane from the seeds (heating rate 180 °C/h), then to 200 °C (heating rate 3 °C/min), maintained at 200 °C for 1 h and finally heated at reflux (305 °C, heating rate 7 °C/min) and maintained for 1 h. The mixture was washed as before. The transfer into water was performed using a modified protocol based on a previously reported method.<sup>2</sup> Briefly, 280 mg of poly(maleic anhydride-alt-1-octadecene); PMAO (MW 30000–50000 Da) were added to a flask containing 200 mL of chloroform and placed in an ultrasonic bath.

Twenty milligrams of NPs diluted in  $\text{CHCl}_3$  were added drop-wise and the mixture was left in the ultrasonic bath for further 15 min. The solvent was slowly removed under vacuum and 15 mL of 0.1 M NaOH was added to transfer the MNPs to the aqueous phase. To remove the excess of unbound polymer, the solution was centrifuged at  $75600 \times g$  for 2 h fourfold.

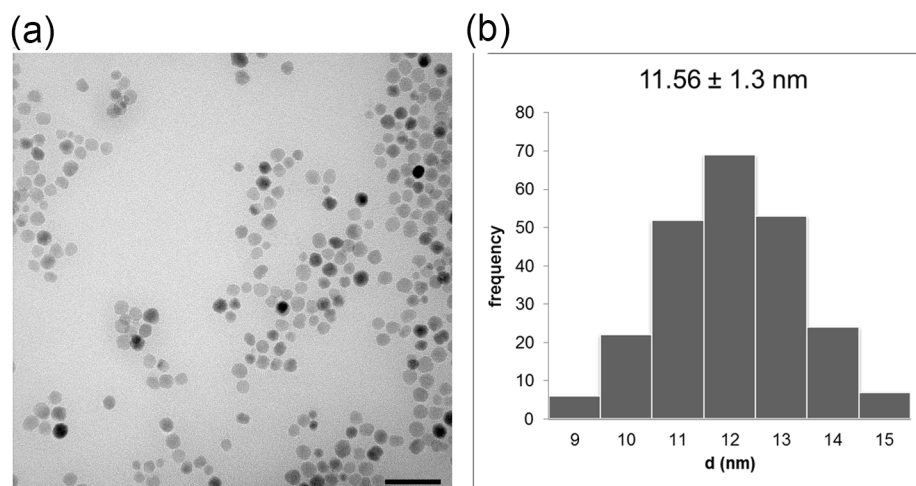

**Figure S1.** (a) TEM image and (b) histogram of NPs in hexane, obtained after thermal decomposition of Fe(III) acetylacetonate, with a mean diameter of around 12 nm. Scale bar: 50 nm.



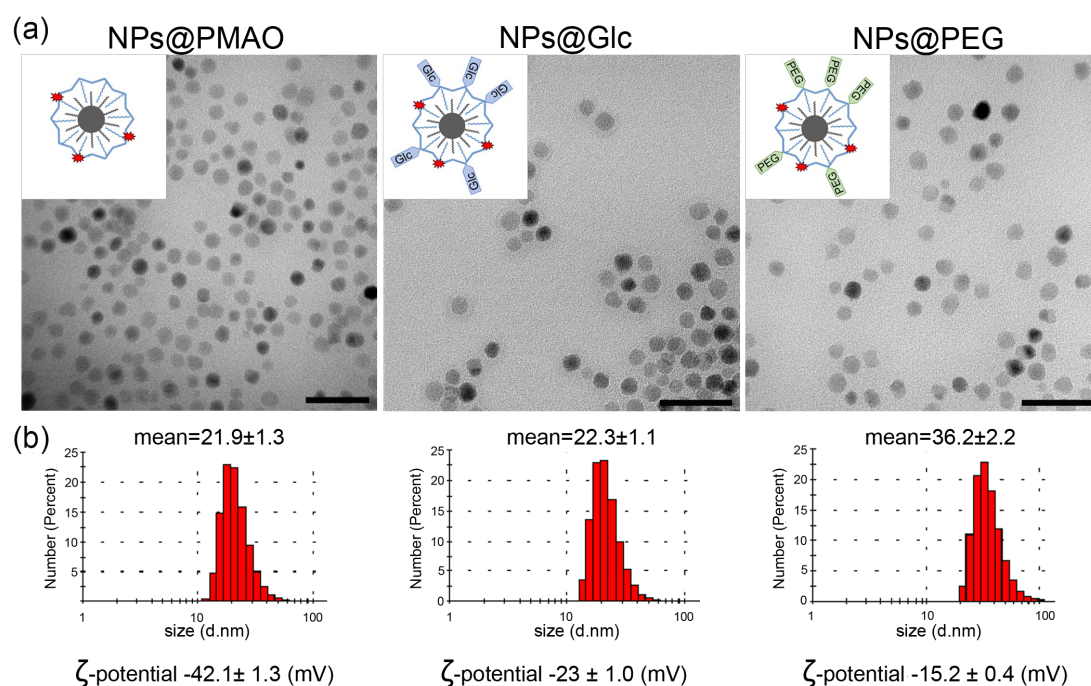

**Figure S2.** Characterization of NPs@PMAO, NPs@Glc and NPs@PEG by (a) TEM, (b) DLS and  $\zeta$ -potential. (a) TEM images demonstrate that all NPs share the same size and shape (scale bar: 50 nm). In the left upper corner a schematic diagram of each NP can be found. Readers are referred to Scheme S1 for further information. (b) DLS measurements show that all three NPs types presented narrow size distribution. Reduction in the surface charge of NPs@Glc and NPs@PEG in respect to NPs@PMAO confirms the functionalization of those NPs

- **Evaluation of NPs stability**

Stability of all three NPs types was evaluated performing DLS measurements after the incubation of the NPs in water, PBS or DMEM supplemented with 10% bovine serum for 0, 24 or 48 hours. Each sample was measured three times, combining 10 runs *per* measurement at 25 °C.



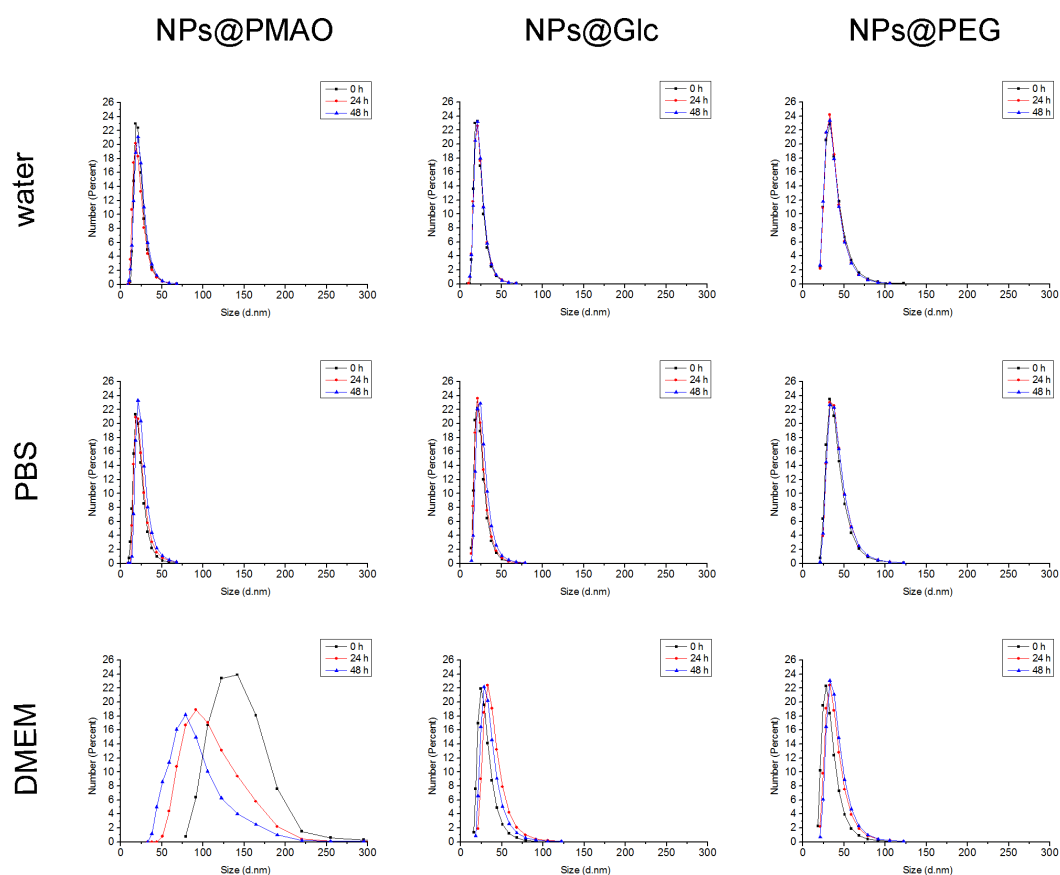

**Figure S3.** Stability of NPs@PMAO, NPs@Glc and NPs@PEG incubated in water, PBS and complete DMEM (supplemented with 10% bovine serum) measured at three time points: 0, 24 and 48 h. Both functionalized NPs, NPs@Glc and NPs@PEG are stable in all tested mediums up to 48 h, whereas NPs@PMAO aggregate immediately in DMEM as an increment of hydrodynamic diameter is observed.

- **Protein Corona study**

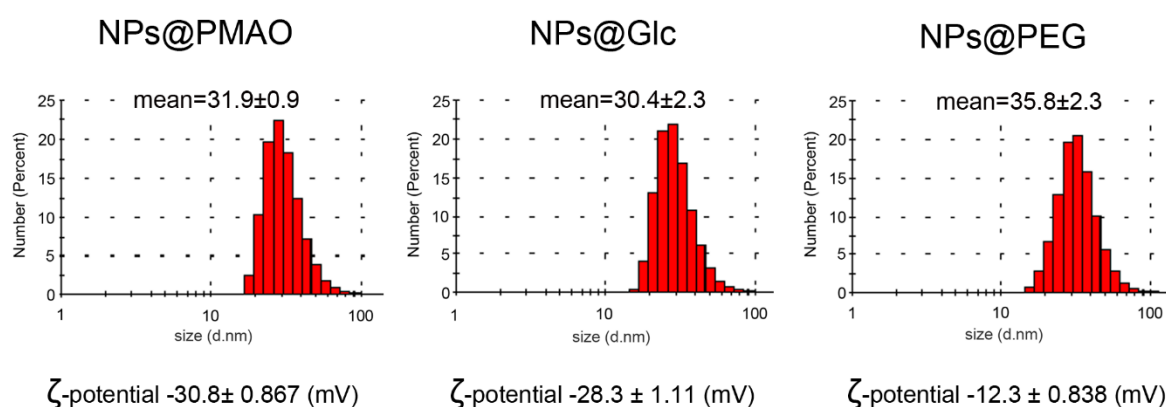

**Figure S4.** Characterization of NPs@PMAO, NPs@Glc and NPs@PEG after the formation of the PC. A slight increase in the hydrodynamic diameter and a change in zeta potential were observed for all three NPs types of NPs, in respect to their counterparts without PC (Figure S2b).

### Protein corona quantification

To proceed with quantification of the amount of protein bound by the nanoparticles, Bicinchoninic Acid (BCA)-assay was used. Briefly, BCA working reagent was prepared by mixing 50 vol of BCA stock solution (Bichinoninic acid, sodium carbonate, sodium tartrate and sodium bicarbonate in 0.1 N NaOH, pH 11.25) with 1 vol of 4 %  $\text{CuSO}_4 \cdot 5\text{H}_2\text{O}$  solution prior to beginning the assay. BSA protein standard ( $0 \mu\text{g} \mu\text{L}^{-1}$  to  $1 \mu\text{g} \mu\text{L}^{-1}$ ) and samples were analyzed in triplicates.  $25 \mu\text{L}$  protein samples were mixed with  $200 \mu\text{L}$  BCA Working Reagent and were incubated at  $60^\circ\text{C}$  for 15 min before reading at 562 nm.

**Table S1.** Number of proteins and peptides bound to each type of NPs identified by LS-MS/MS.

|   | Sample   | Proteins | Peptides |
|---|----------|----------|----------|
| A | NPs@PMAO | 272      | 2755     |
| B | NP@PEG   | 284      | 2664     |
| C | NP@Glc   | 305      | 3101     |

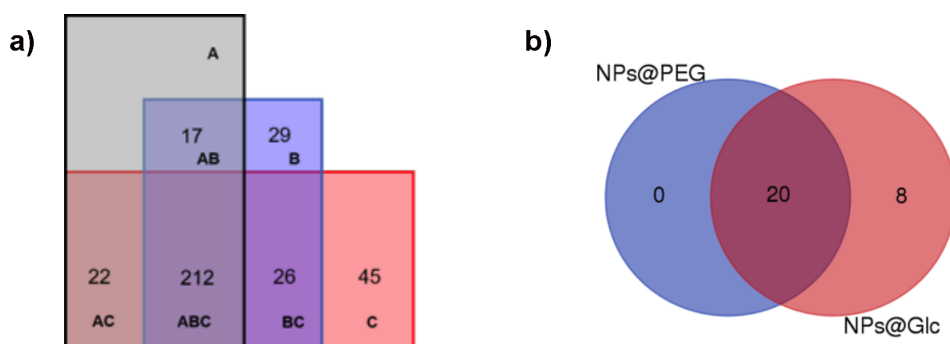

**Figure S5. a)** Diagram distribution of the 372 different proteins identified, showing the overlapping detected. The specific bound proteins to each type of NPs are represented with pure colors: A- NPs@PMAO, B- NPs@PEG, and C- NPs@Glc, whereas: AB- represents proteins common for NP@PMAO and NPs@PEG; AC- represents proteins common for NP@PMAO and NPs@Glc; BC-

represents proteins common for NP@PEG and NPs@Glc; ABC- represents proteins common for all three NPs type. **b)** Venn diagram corresponding to the molecular and cellular function analysis from NPs@PEG and NPs@Glc samples generated by the Ingenuity pathway analysis software (Table S5).

**Table S2.** Specific bound proteins identified on the surface of NPs@PMAO

| Accession <sup>[a]</sup> | Name                                                             | Score <sup>[b]</sup> | Peptides <sup>[c]</sup> | SC [%] <sup>[d]</sup> | RMS90 [ppm] <sup>[e]</sup> |
|--------------------------|------------------------------------------------------------------|----------------------|-------------------------|-----------------------|----------------------------|
| A5PJE3_BOVIN             | Fibrinogen alpha chain                                           | 548,9                | 13                      | 22,60                 | 0,70                       |
| TBA4A_BOVIN              | Tubulin alpha-4A chain                                           | 195,9                | 4                       | 12,90                 | 208,93                     |
| A6QLB7_BOVIN             | Adenylyl cyclase-associated protein                              | 111,7                | 3                       | 10,80                 | 4,21                       |
| A0A0F7RPX0_BOVIN         | Macrophage migration inhibitory factor                           | 75,6                 | 2                       | 17,40                 | 1,07                       |
| ENPP2_BOVIN              | Ectonucleotide pyrophosphatase/phosphodiesterase family member 2 | 74,3                 | 3                       | 5,50                  | 3,52                       |
| EF1A1_BOVIN              | Elongation factor 1-alpha 1                                      | 59,2                 | 2                       | 11,30                 | 1,56                       |
| F1N1W3_BOVIN             | Thrombospondin-2                                                 | 59,1                 | 2                       | 1,60                  | 0,67                       |
| TRFL_BOVIN               | Lactotransferrin                                                 | 53,2                 | 2                       | 2,30                  | 0,83                       |
| LDHB_BOVIN               | L-lactate dehydrogenase B chain                                  | 48,2                 | 2                       | 7,50                  | 1,13                       |
| TBB4A_BOVIN              | Tubulin beta-4A chain                                            | 46,0                 | 2                       | 9,50                  | 3,85                       |
| COTL1_BOVIN              | Coactosin-like protein                                           | 45,1                 | 1                       | 11,30                 | 2,34                       |
| PYGL_BOVIN               | Glycogen phosphorylase, liver form                               | 43,6                 | 1                       | 1,60                  | 614,55                     |
| E1B7G5_BOVIN             | Uncharacterized protein                                          | 42,7                 | 1                       | 0,70                  | 0,31                       |
| NUCB1_BOVIN              | Nucleobindin-1                                                   | 41,7                 | 1                       | 3,40                  | 0,20                       |
| G3N2H5_BOVIN             | Protein S100 (Fragment)                                          | 30,3                 | 1                       | 25,50                 | 3,08                       |
| B4GA1_BOVIN              | Beta-1,4-glucuronyltransferase 1                                 | 28,2                 | 1                       | 6,70                  | 6,75                       |
| E1B9R5_BOVIN             | Uncharacterized protein                                          | 27,7                 | 1                       | 0,10                  | 0,77                       |
| ORC4_BOVIN               | Origin recognition complex subunit 4                             | 26,8                 | 1                       | 3,40                  | 3,39                       |
| F1MZX6_BOVIN             | Uncharacterized protein                                          | 26,6                 | 1                       | 0,50                  | 0,98                       |
| Q08DQ6_BOVIN             | Uncharacterized protein                                          | 26,2                 | 1                       | 2,00                  | 0,85                       |
| Q08DR4_BOVIN             | UDP-glucose ceramide glucosyltransferase                         | 26,2                 | 1                       | 1,50                  | 0,55                       |

[a] accession: a unique identifier given to a biological polymer sequence (protein) when it is submitted to a sequence data base

[b] score: number which reflects the combined scores of all observed mass spectra that can be matched to amino acid sequences within that protein. A higher score indicates a more confident match

[c] peptides: number of peptides detected for each protein identified

[d] SC (%): percentage of the database protein sequence covered by matching peptides

[e] RMS90 [ppm]: mass accuracy of generated data.

**Table S3.** Specific bound proteins identified on the surface of NPs@Glc

| Accession <sup>[a]</sup> | Name                                            | Score <sup>[b]</sup> | Peptides <sup>[c]</sup> | SC [%] <sup>[d]</sup> | RMS90 [ppm] <sup>[e]</sup> |
|--------------------------|-------------------------------------------------|----------------------|-------------------------|-----------------------|----------------------------|
| F1MMK9_BOVIN             | Protein AMBP                                    | 999,5                | 14                      | 40,30                 | 1,26                       |
| F1MUT4_BOVIN             | Coagulation factor XI                           | 631,6                | 18                      | 44,50                 | 0,67                       |
| FIBB_BOVIN               | Fibrinogen beta chain                           | 377,1                | 12                      | 30,10                 | 1,34                       |
| Q1RMN9_BOVIN             | C4b-binding protein alpha-like                  | 305,7                | 7                       | 46,40                 | 0,27                       |
| PROF1_BOVIN              | Profilin-1                                      | 124,0                | 4                       | 32,90                 | 1,53                       |
| G3MY71_BOVIN             | Uncharacterized protein (Fragment)              | 107,5                | 1                       | 15,00                 | 2,07                       |
| G5E604_BOVIN             | Uncharacterized protein (Fragment)              | 93,0                 | 1                       | 15,00                 | 3,88                       |
| S10AC_BOVIN              | Protein S100-A12                                | 90,2                 | 3                       | 58,70                 | 187,01                     |
| TBB4B_BOVIN              | Tubulin beta-4B chain                           | 87,5                 | 3                       | 17,10                 | 1,16                       |
| G1K1A3_BOVIN             | Nucleoside diphosphate kinase (Fragment)        | 82,5                 | 2                       | 20,90                 | 1,81                       |
| F1MXR3_BOVIN             | Uncharacterized protein                         | 77,2                 | 2                       | 3,30                  | 0,97                       |
| A5D7L1_BOVIN             | CLEC11A protein                                 | 76,4                 | 2                       | 5,90                  | 1,39                       |
| ALDOB_BOVIN              | Fructose-bisphosphate aldolase B                | 73,5                 | 2                       | 9,10                  | 1,96                       |
| F1MPD1_BOVIN             | Uncharacterized protein (Fragment)              | 72,8                 | 1                       | 0,90                  | 0,34                       |
| CTHL4_BOVIN              | Cathelicidin-4                                  | 70,9                 | 1                       | 11,10                 | 3,02                       |
| F1MPP2_BOVIN             | Uncharacterized protein                         | 68,0                 | 2                       | 9,90                  | 1,96                       |
| BLVRB_BOVIN              | Flavin reductase (NADPH)                        | 63,9                 | 1                       | 10,20                 | 3,91                       |
| F1N401_BOVIN             | Collagen alpha-1(XII) chain                     | 63,3                 | 2                       | 1,00                  | 585,81                     |
| E1B9H5_BOVIN             | Uncharacterized protein                         | 60,4                 | 1                       | 1,40                  | 0,93                       |
| F1MRZ8_BOVIN             | Uncharacterized protein                         | 54,7                 | 1                       | 4,00                  | 2,52                       |
| TIMP1_BOVIN              | Metalloproteinase inhibitor 1                   | 52,8                 | 1                       | 9,70                  | 1,02                       |
| F1N3V0_BOVIN             | Malic enzyme                                    | 48,3                 | 1                       | 1,80                  | 1,54                       |
| DDBX_BOVIN               | Dihydrodiol dehydrogenase 3                     | 44,2                 | 1                       | 5,90                  | 0,69                       |
| PPIE_BOVIN               | Peptidyl-prolyl cis-trans isomerase E           | 43,9                 | 1                       | 6,60                  | 0,09                       |
| BASP1_BOVIN              | Brain acid soluble protein 1                    | 43,0                 | 1                       | 6,20                  | 2,62                       |
| GLO2_BOVIN               | Hydroxyacylglutathione hydrolase, mitochondrial | 42,3                 | 2                       | 7,10                  | 1,92                       |

|              |                                                 |      |   |       |         |
|--------------|-------------------------------------------------|------|---|-------|---------|
| ISK6_BOVIN   | Serine protease inhibitor Kazal-type 6          | 42,2 | 1 | 20,00 | 0,62    |
| ANG1_BOVIN   | Angiogenin-1                                    | 40,6 | 2 | 15,50 | 0,53    |
| A3KLR9_BOVIN | Superoxide dismutase [Cu-Zn]                    | 39,8 | 1 | 5,40  | 2,73    |
| F1MRZ5_BOVIN | Uncharacterized protein                         | 39,5 | 1 | 1,70  | 8,31    |
| HSP7C_BOVIN  | Heat shock cognate 71 kDa protein               | 37,5 | 2 | 3,80  | 1,50    |
| E1BH94_BOVIN | Uncharacterized protein (Fragment)              | 35,5 | 1 | 6,10  | 291,07  |
| E1BF01_BOVIN | Uncharacterized protein                         | 33,3 | 1 | 0,40  | 0,20    |
| IBP3_BOVIN   | Insulin-like growth factor-binding protein 3    | 31,8 | 1 | 2,70  | 0,71    |
| PRDX2_BOVIN  | Peroxiredoxin-2                                 | 30,8 | 1 | 9,00  | 1,81    |
| VASP_BOVIN   | Vasodilator-stimulated phosphoprotein           | 30,5 | 1 | 2,30  | 0,50    |
| MPRI_BOVIN   | Cation-independent mannose-6-phosphate receptor | 30,3 | 1 | 0,40  | 1,36    |
| F1MS67_BOVIN | Uncharacterized protein                         | 29,8 | 1 | 0,60  | 1076,73 |
| A6QLN7_BOVIN | Dimethylaniline monooxygenase [N-oxide-forming] | 29,3 | 2 | 2,60  | 1,54    |
| F1N169_BOVIN | Uncharacterized protein                         | 28,1 | 1 | 0,60  | 3,20    |
| FGL2_BOVIN   | Fibroleukin                                     | 27,6 | 1 | 1,80  | 0,35    |
| MBL2_BOVIN   | Mannose-binding protein C                       | 27,6 | 1 | 3,60  | 2,22    |
| F1MKN3_BOVIN | 28S ribosomal protein S34, mitochondrial        | 25,7 | 1 | 3,20  | 0,24    |
| G3N0B5_BOVIN | Uncharacterized protein                         | 25,6 | 1 | 5,40  | 6,59    |
| FGL1_BOVIN   | Fibrinogen-like protein 1                       | 25,5 | 1 | 2,90  | 0,82    |

[a] accession: a unique identifier given to a biological polymer sequence (protein) when it is submitted to a sequence data base

[b] score: number which reflects the combined scores of all observed mass spectra that can be matched to amino acid sequences within that protein. A higher score indicates a more confident match

[c] peptides: number of peptides detected for each protein identified

[d] SC (%): percentage of the database protein sequence covered by matching peptides

[e] RMS90 [ppm]: mass accuracy of generated data.

**Table S4.** Specific bound proteins identified on the surface of NPs@PEG

| Accession <sup>a</sup> | Name                                                 | Score <sup>b</sup> | Peptides <sup>c</sup> | SC [%] <sup>d</sup> | RMS90 [ppm] <sup>e</sup> |
|------------------------|------------------------------------------------------|--------------------|-----------------------|---------------------|--------------------------|
| E1BFN5_BOVIN           | Uncharacterized protein                              | 758,1              | 13                    | 22,00               | 2,01                     |
| ACTA_BOVIN             | Actin, aortic smooth muscle                          | 325,6              | 7                     | 19,90               | 2,49                     |
| K1C10_BOVIN            | Keratin, type I cytoskeletal 10                      | 298,1              | 9                     | 14,10               | 0,65                     |
| K2C7_BOVIN             | Keratin, type II cytoskeletal 7                      | 228,3              | 3                     | 6,40                | 0,94                     |
| F1MFW9_BOVIN           | Uncharacterized protein (Fragment)                   | 217,2              | 3                     | 6,70                | 2,50                     |
| LYSC_BOVIN             | Lysozyme C                                           | 113,4              | 2                     | 22,40               | 1,90                     |
| Q3ZBY4_BOVIN           | Fructose-bisphosphate aldolase                       | 70,1               | 1                     | 6,30                | 1,28                     |
| LDHA_BOVIN             | L-lactate dehydrogenase A chain                      | 61,6               | 2                     | 6,60                | 1,01                     |
| E1B9V3_BOVIN           | Phospholipase A(2)                                   | 60,3               | 1                     | 8,80                | 1,94                     |
| G1K238_BOVIN           | Collagen alpha-1(IV) chain                           | 58,1               | 1                     | 0,90                | 0,93                     |
| RS27A_BOVIN            | Ubiquitin-40S ribosomal protein S27a                 | 56,1               | 2                     | 16,00               | 0,99                     |
| G3N269_BOVIN           | Fatty acid-binding protein, epidermal                | 52,0               | 1                     | 6,70                | 0,01                     |
| E1BIR8_BOVIN           | Uncharacterized protein                              | 43,0               | 1                     | 0,30                | 0,84                     |
| G3X6S5_BOVIN           | SH3 domain-binding glutamic acid-rich-like protein 3 | 38,2               | 1                     | 5,60                | 0,37                     |
| E1BJB1_BOVIN           | Uncharacterized protein                              | 37,9               | 2                     | 9,90                | 1,89                     |
| A2VDR1_BOVIN           | RAB40C, member RAS oncogene family                   | 37,3               | 1                     | 5,70                | 9,31                     |
| KIF3C_BOVIN            | Kinesin-like protein KIF3C                           | 34,5               | 1                     | 0,80                | 0,56                     |
| ZA2G_BOVIN             | Zinc-alpha-2-glycoprotein                            | 33,7               | 1                     | 5,70                | 2,23                     |
| RCN3_BOVIN             | Reticulocalbin-3                                     | 32,2               | 1                     | 3,70                | 0,63                     |
| F1MWU2_BOVIN           | Uncharacterized protein (Fragment)                   | 31,1               | 1                     | 1,20                | 1,48                     |
| Q2KJH7_BOVIN           | Aldehyde dehydrogenase 18 family, member A1          | 30,7               | 1                     | 1,00                | 0,32                     |
| F1MWU9_BOVIN           | Uncharacterized protein                              | 30,1               | 1                     | 1,70                | 3,73                     |
| E1BBC8_BOVIN           | Uncharacterized protein                              | 29,6               | 1                     | 0,80                | 4,14                     |
| Q0VD16_BOVIN           | MAP2K1 protein                                       | 28,9               | 1                     | 2,00                | 0,28                     |
| C1K3N7_BOVIN           | Thymosin beta 4 X-linked                             | 28,0               | 1                     | 27,30               | 3,05                     |
| A4IFL4_BOVIN           | PPARD protein                                        | 27,2               | 1                     | 1,60                | 2,51                     |
| VWF_BOVIN              | von Willebrand factor (Fragment)                     | 27,2               | 1                     | 2,60                | 0,18                     |
| E1BB21_BOVIN           | Desmocollin-3                                        | 27,0               | 1                     | 1,00                | 1069,44                  |

|            |                           |      |   |      |      |
|------------|---------------------------|------|---|------|------|
| URP2_BOVIN | Fermitin family homolog 3 | 26,2 | 1 | 1,40 | 2,88 |
|------------|---------------------------|------|---|------|------|

[a] accession: a unique identifier given to a biological polymer sequence (protein) when it is submitted to a sequence data base

[b] score: number which reflects the combined scores of all observed mass spectra that can be matched to amino acid sequences within that protein. A higher score indicates a more confident match

[c] peptides: number of peptides detected for each protein identified

[d] SC (%): percentage of the database protein sequence covered by matching peptide

**Table S5.** Molecular and Cellular Function analysis from NPs@PEG and NPs@Glc samples generated by the Ingenuity pathway analysis software.

| Sample            | Number | Molecular and Cellular Functions           | NPs@PEG protein Number | NPs@Glc protein Number |
|-------------------|--------|--------------------------------------------|------------------------|------------------------|
| NPs@Glc & NPs@PEG | 20     | Gene Expression                            | 2                      | 2                      |
|                   |        | Vitamin and Mineral Metabolism             | 1                      | 2                      |
|                   |        | Cellular Assembly and Organization         | 4                      | 10                     |
|                   |        | Cellular Function and Maintenance          | 6                      | 12                     |
|                   |        | Cell Death and Survival                    | 6                      | 20                     |
|                   |        | Cell-To-Cell Signaling and Interaction     | 4                      | 21                     |
|                   |        | Cellular Development                       | 6                      | 16                     |
|                   |        | Cell Cycle                                 | 2                      | 5                      |
|                   |        | Cellular Growth and Proliferation          | 4                      | 16                     |
|                   |        | Cellular Movement                          | 8                      | 19                     |
|                   |        | Carbohydrate Metabolism                    | 6                      | 9                      |
|                   |        | Molecular Transport                        | 5                      | 12                     |
|                   |        | Cellular Compromise                        | 4                      | 4                      |
|                   |        | Energy Production                          | 2                      | 2                      |
|                   |        | Small Molecule Biochemistry                | 7                      | 16                     |
|                   |        | Cell Morphology                            | 4                      | 18                     |
|                   |        | Drug Metabolism                            | 1                      | 2                      |
|                   |        | Lipid Metabolism                           | 5                      | 11                     |
|                   |        | Amino Acid Metabolism                      | 1                      | 1                      |
|                   |        | Protein Synthesis                          | 3                      | 11                     |
| NPs@Glc           | 8      | Protein Trafficking                        |                        | 6                      |
|                   |        | Protein Degradation                        |                        | 3                      |
|                   |        | Nucleic Acid Metabolism                    |                        | 2                      |
|                   |        | Post-Translational Modification            |                        | 3                      |
|                   |        | RNA Damage and Repair                      |                        | 2                      |
|                   |        | DNA Replication, Recombination, and Repair |                        | 2                      |
|                   |        | Cell Signaling                             |                        | 6                      |
|                   |        | Free Radical Scavenging                    |                        | 2                      |

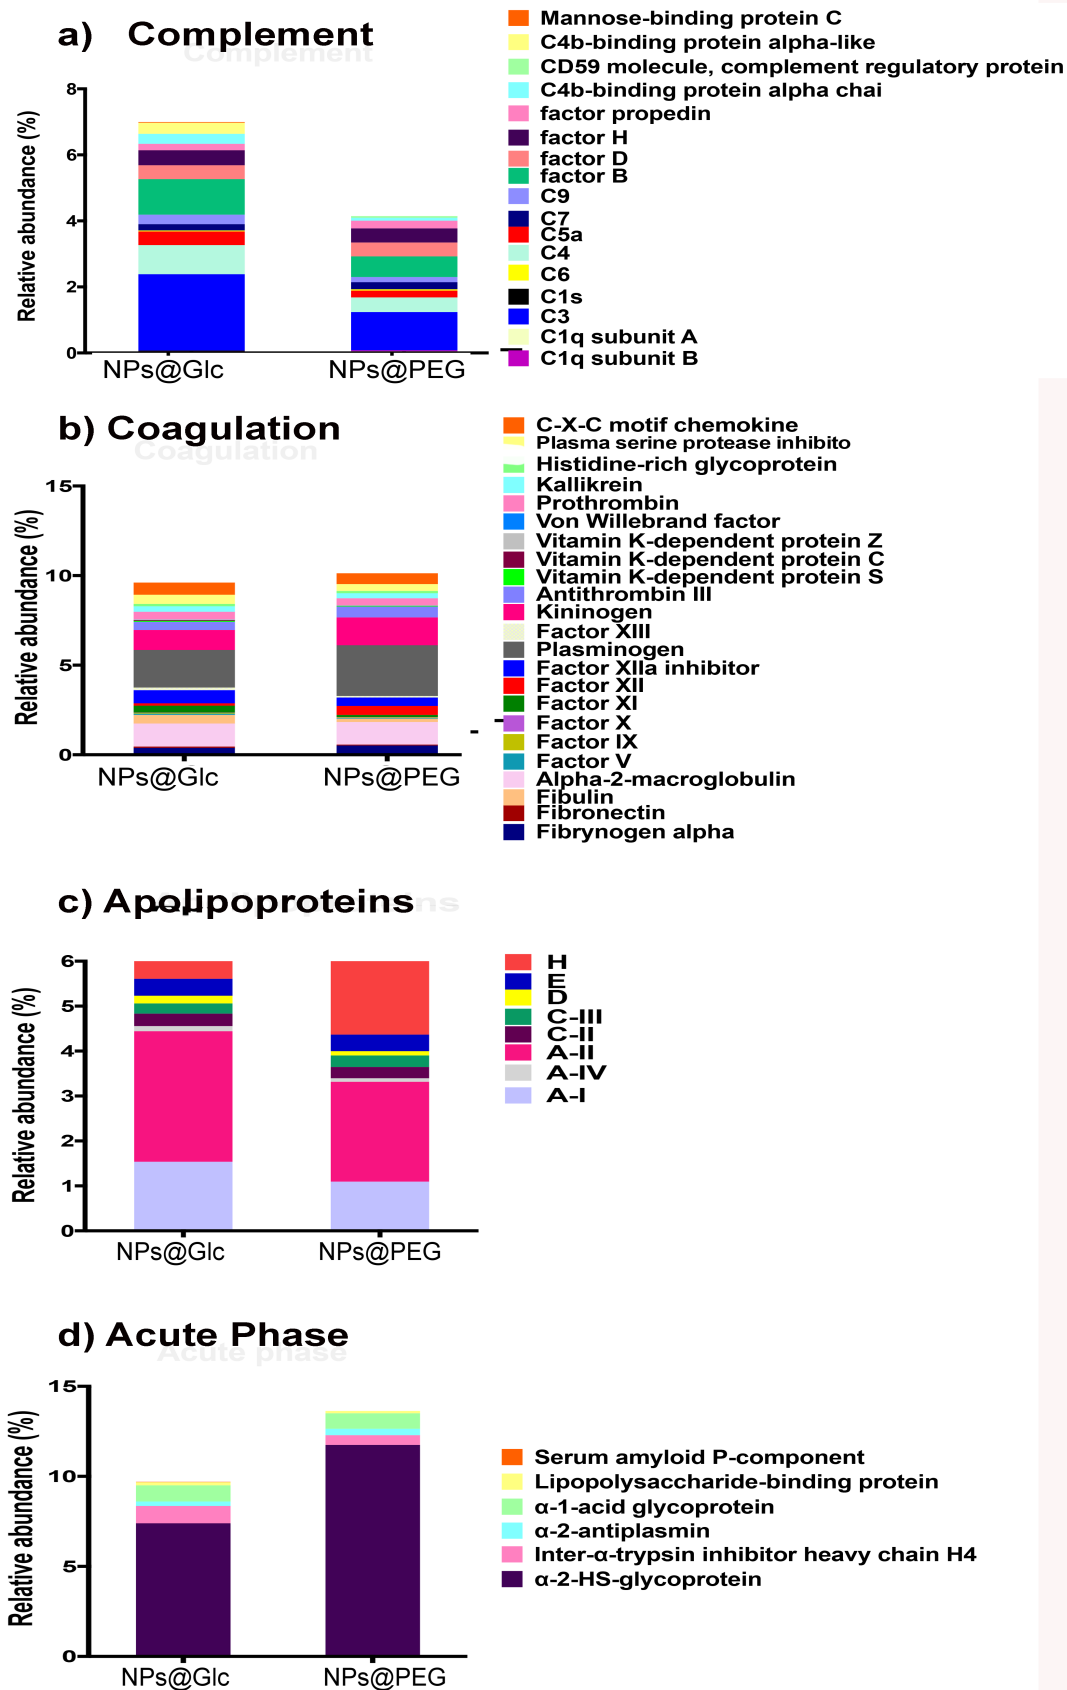

**Figure S6.** Relative abundance of proteins from (a) complement, (b) coagulation, (c) apolipoproteins and (d) acute phase group, adsorbed on NPs@Glc and NPs@PEG.



- *In vitro* degradation study of the NPs

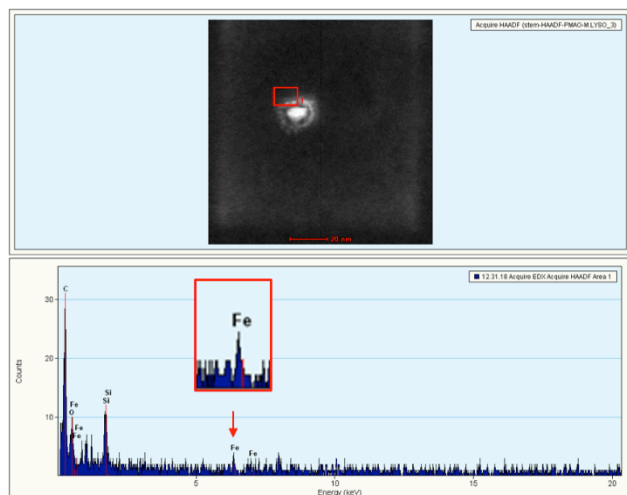

**Figure S7.** X-Ray Microanalysis of the NPs@PMAO incubated in the lysosomal medium showed that the dissolved iron was retained around NP core and most probably made a complex with the PMAO polymer.

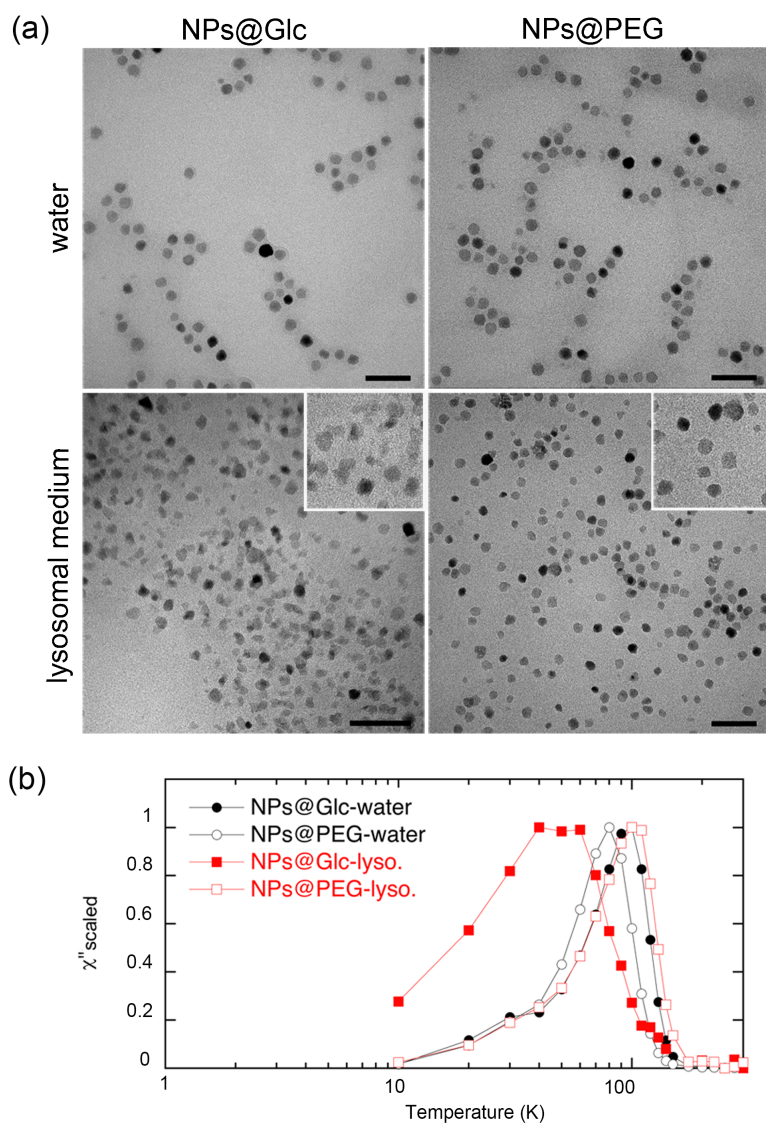

**Figure S8.** (a) *In vitro* degradation study of NPs@Glc and NPs@PEG. Scale bar: 50 nm. (b) Temperature dependence of the out-of-phase component of the AC magnetic susceptibility from NPs@Glc and NPs@PEG incubated for ten days in the lysosomal medium and water (control).

- **Short and long-term toxicity study**

Recently, a study using PEG-coated gold NPs showed that the toxicity induced by the NPs was different depending on the animal gender.<sup>4</sup> Therefore, the biodistribution and toxicity of the two NPs types were analyzed employing 6-weeks old Swiss male and female mice and repeating the *in vivo* experiments at different times and with different batches of NPs, to assure reproducibility of results. Both NP types showed the same results in terms of toxicity and biodistribution profile for both female and male individuals. Therefore the results presented here correspond only to female animals.

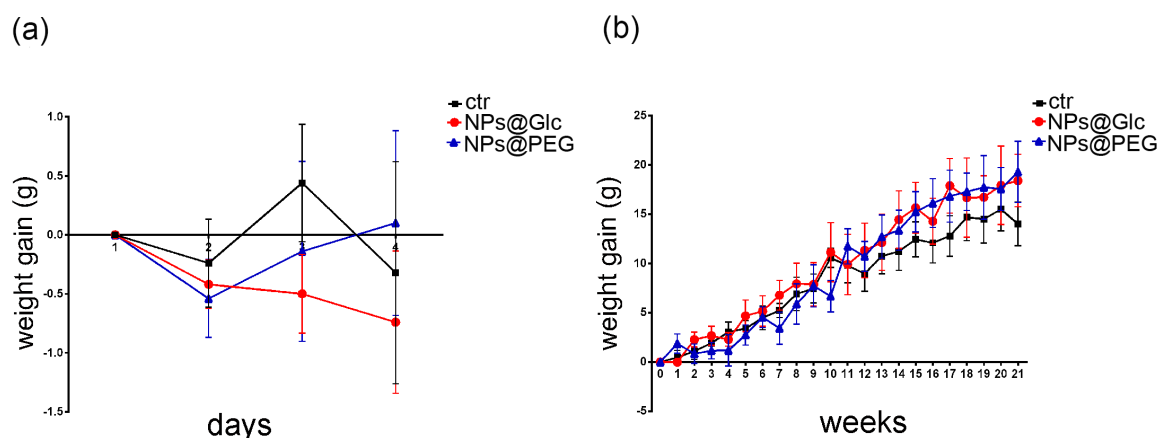

**Figure S9.** Gain of animal body weight during (a) 72 hours and (b) four months study, after the administration of NPs@Glc, NPs@PEG or PBS in the case of control animals. No statistically significant differences have been found between animals injected with NPs and the control ones (unpaired t-test,  $p > 0.05$ ).

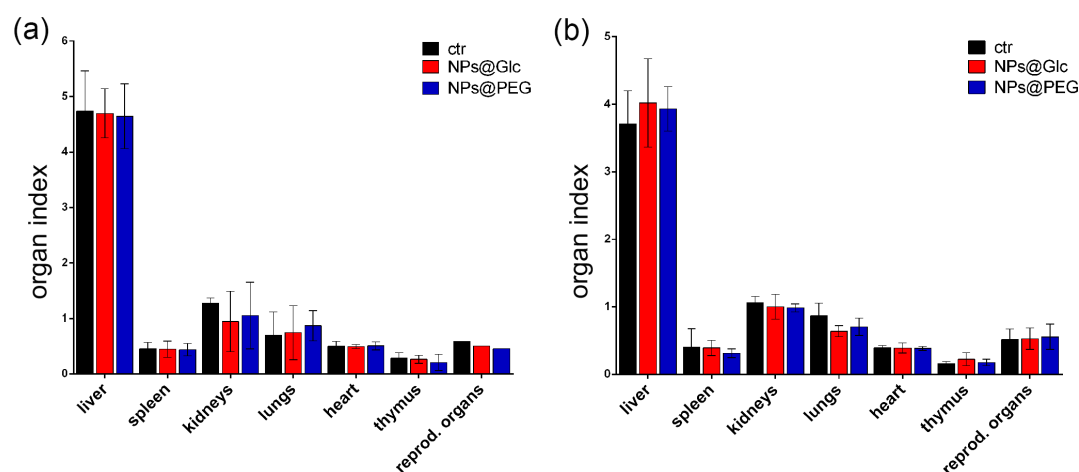

**Figure S10.** Organ index evaluated (a) 72 h and (b) four months after the administration of NPs@Glc, NPs@PEG or PBS in the case of control animals. No statistically significant differences have been found between animals injected with NPs and the control ones (unpaired t-test,  $p > 0.05$ ).



- **Histology examination of hematoxylin and eosin stained tissue sections**

For pathological examination of the organs, pieces of the excised organs were fixed and processed as described in the section: *Fluorescence microscopy examination of tissue sections*. After dewaxing and hydration process, the samples were stained with hematoxylin (Carazzi's hematoxylin, Panreac; ref. 255298) and eosin (Panreac; ref. 131026) and mounted with permanent mounting medium DPX.

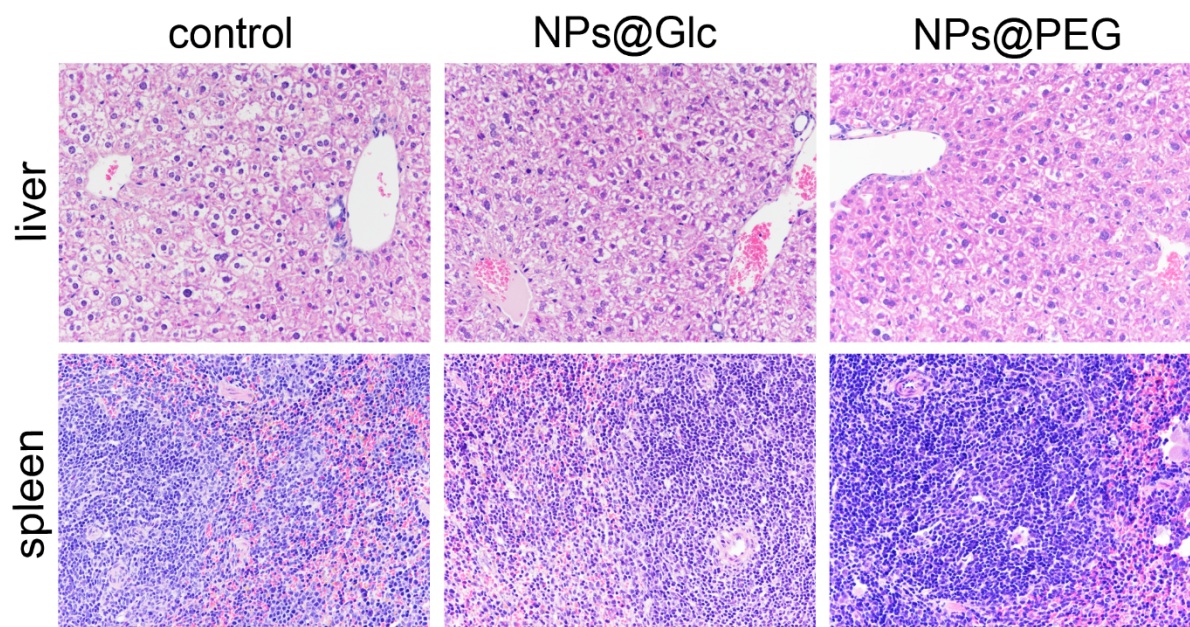

**Figure S11.** Haematoxylin- eosin (HE) staining of the liver and spleen histological sections evaluated 72 h after NPs administration showed no difference in respect to control animals injected with PBS (20 x magnification).

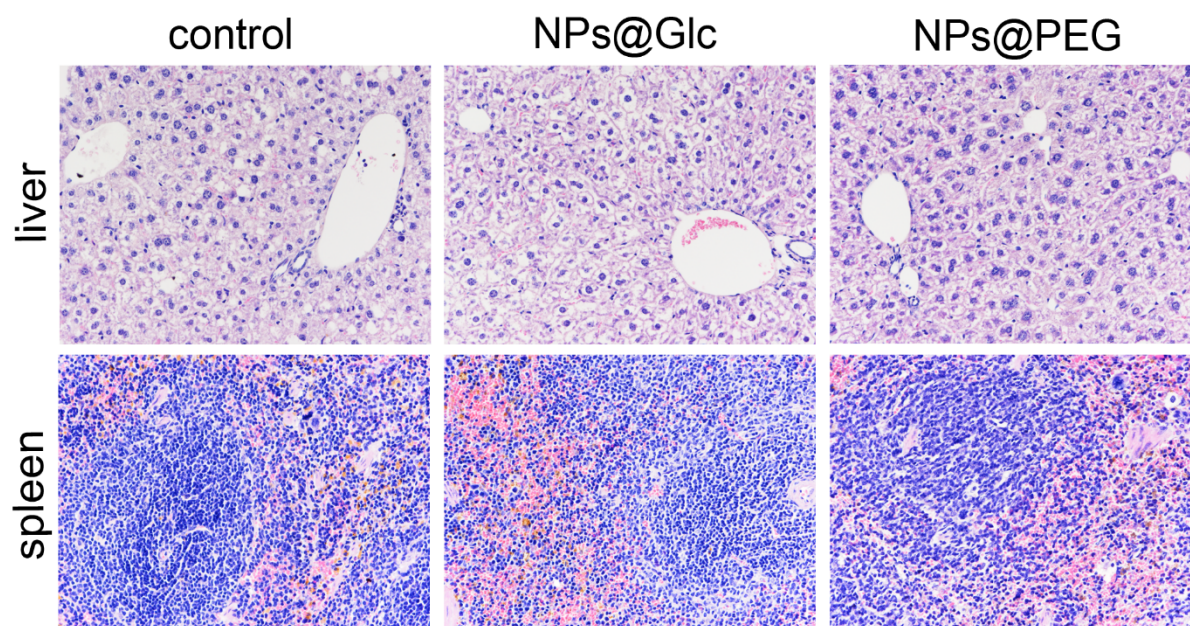

**Figure S12.** Haematoxylin- eosin (HE) staining of the liver and spleen histological sections evaluated four months after NPs administration showed no difference in respect to control animals injected with PBS (20 x magnification).

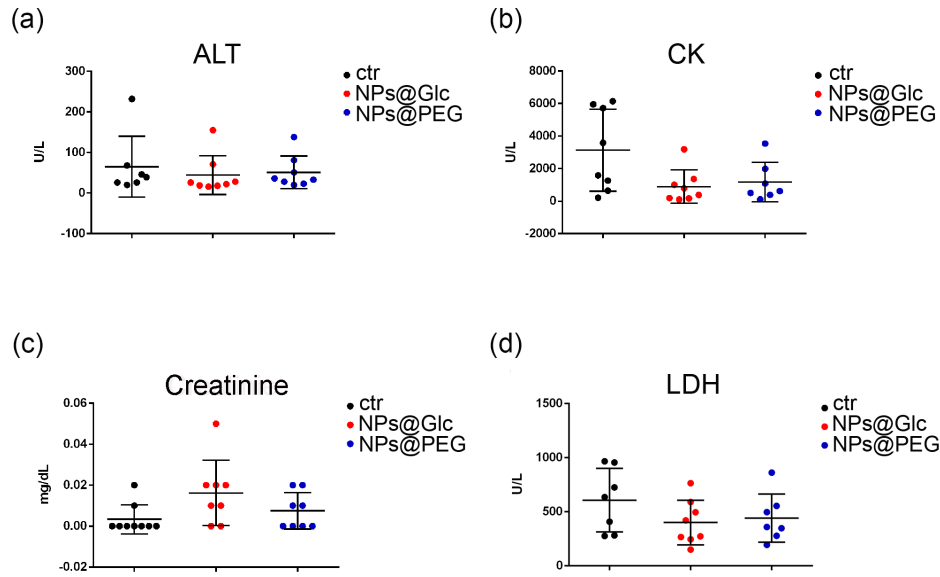

**Figure S13.** Analysis of blood chemical parameters: (a) alanine aminotransferase (ALT), (b) creatinine kinase (CK), (c) creatinine and (d) lactate dehydrogenase (LDH) performed 72 h after the administration of NPs@Glc, NPs@PEG or PBS in the case of control animals. No statistically significant differences have been found between animals injected with NPs and the control ones (unpaired t-test,  $p > 0.05$ ).

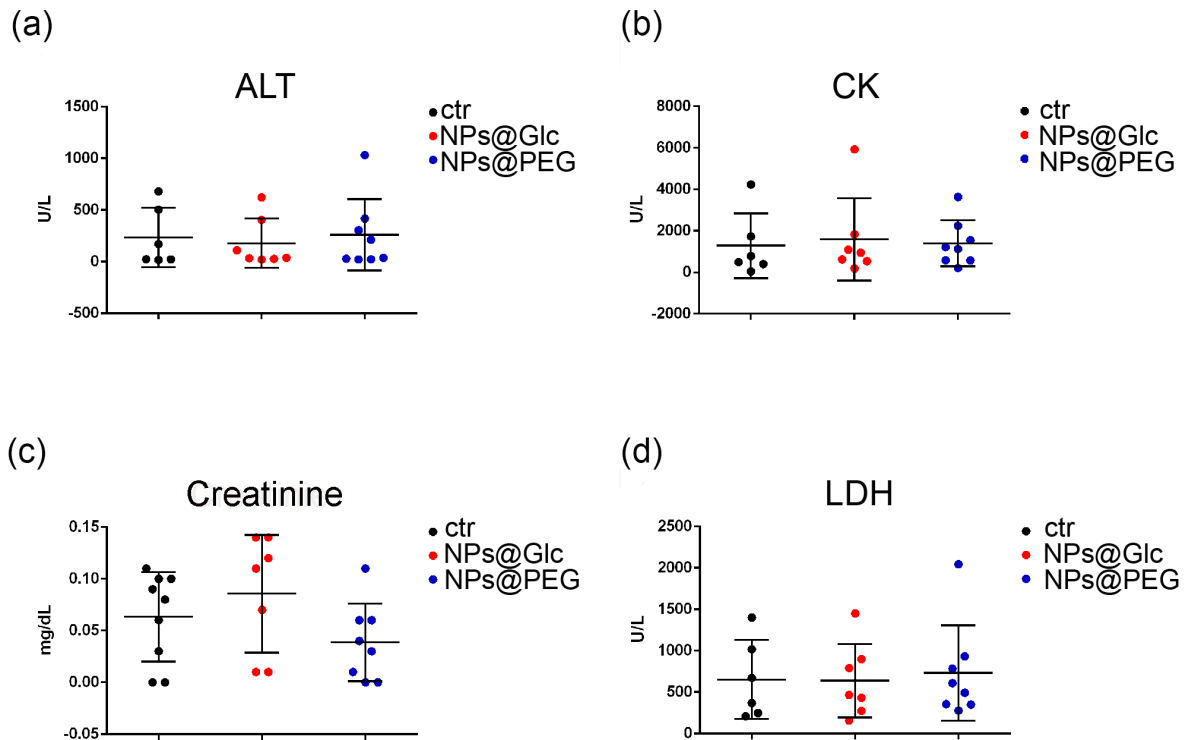



**Figure S14.** Analysis of blood chemical parameters: (a) alanine aminotransferase (ALT), (b) creatinine kinase (CK), (c) creatinine and (d) lactate dehydrogenase (LDH) performed four months after the administration of NPs@Glc, NPs@PEG or PBS in the case of control animals. No statistically significant differences have been found between animals injected with NPs and the control ones (unpaired t-test,  $p > 0.05$ ).

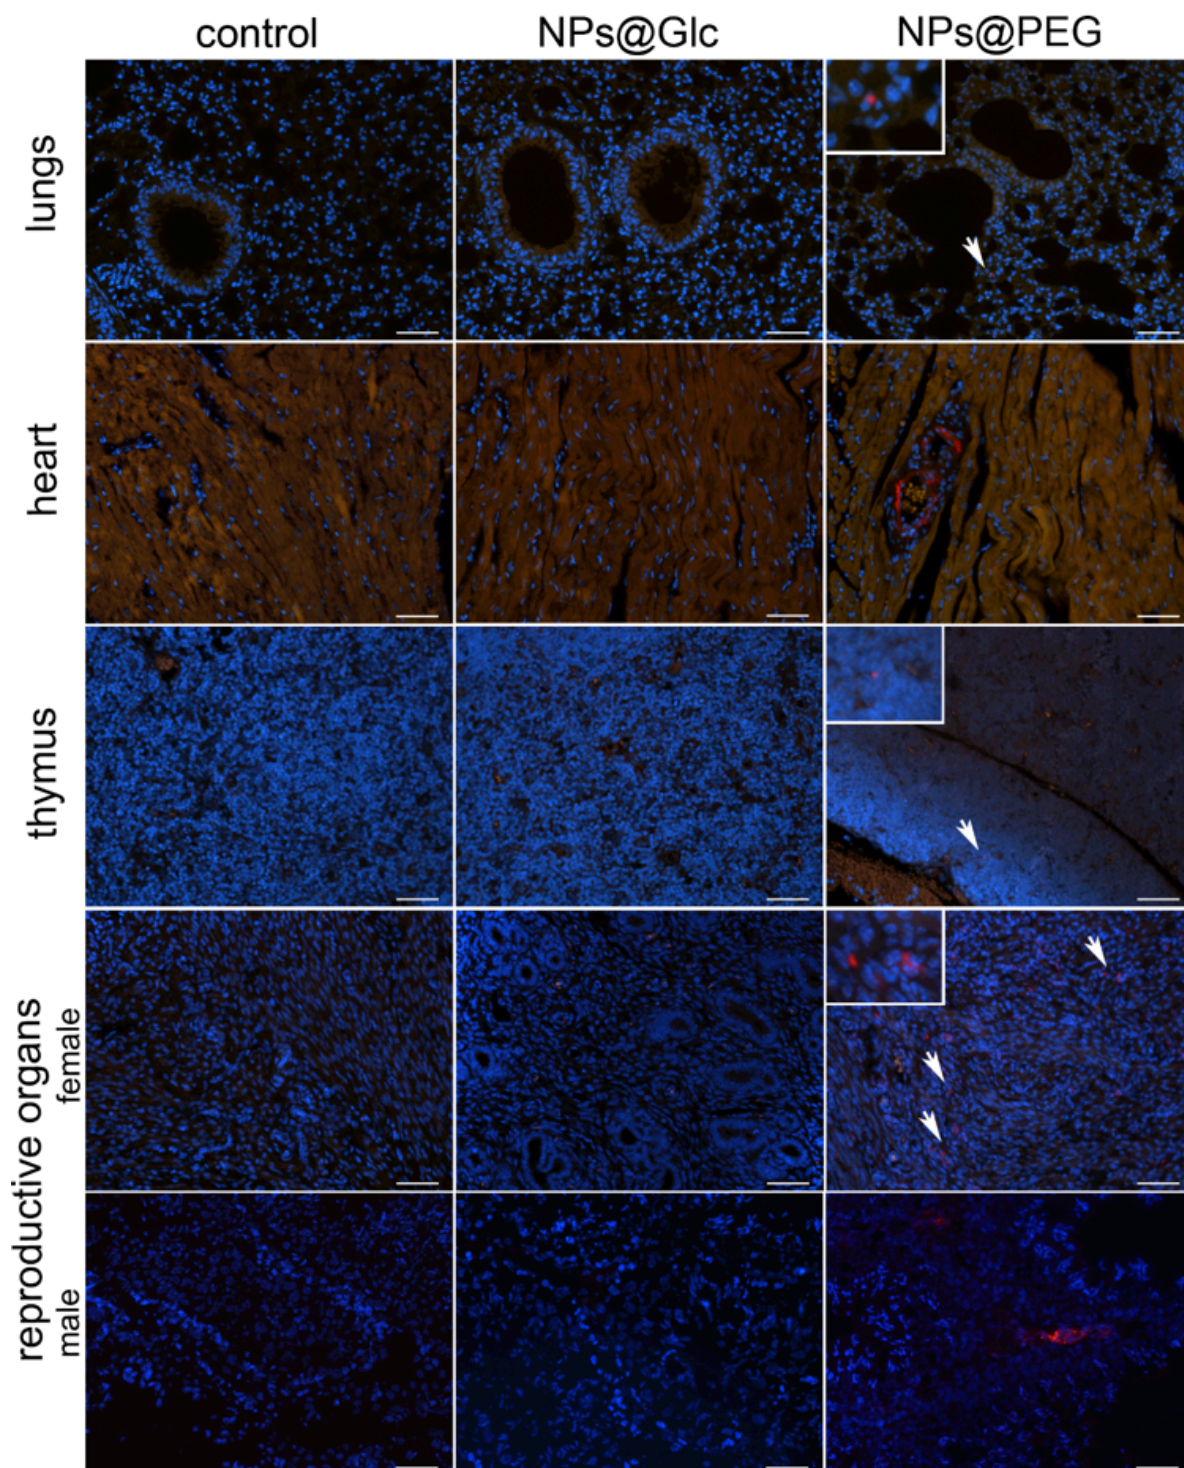

**Figure S15.** Biodistribution of NPs@Glc and NPs@PEG in mice lungs, heart, thymus and reproductive organs, analysed 72 h after NPs administration analyzed by fluorescence microscopy *ex vivo*. NPs@PEG have been detected in all of the mentioned organs, on the contrary to NPs@Glc. For

better visualization of NPs, fluorescence from red and green channels has been imposed. Scarcely accumulated NPs are indicated by white arrows and enlarged in the left upper corner of each corresponding image. Control tissue sections originate from PBS-treated mice. Cell nuclei were labeled with DAPI. Scale bar: 50  $\mu$ m.

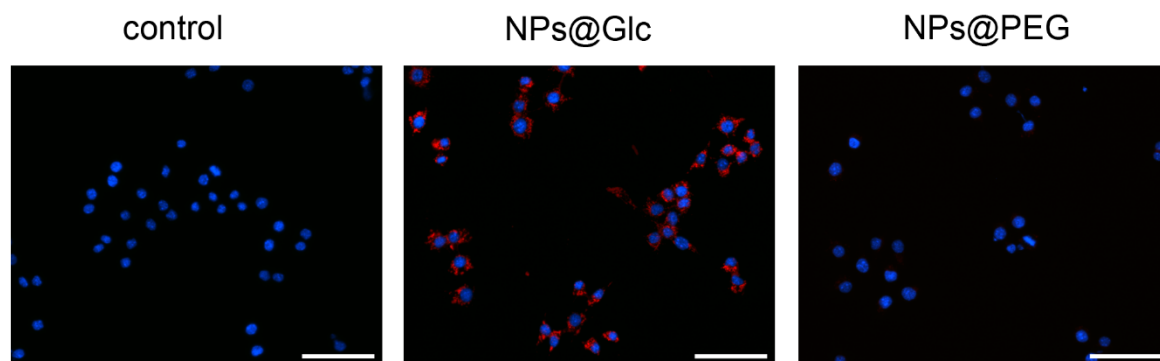

**Figure S16.** Uptake study of NPs@Glc and NPs@PEG bearing PC into mouse leukemic monocyte/macrophage cell line- RAW 264.7. After two hours of incubation in serum-free medium NPs@Glc were abundantly accumulated in the cells as intense red fluorescence was observed, whereas no uptake of NPs@PEG was detected. Cell nuclei were labeled with DAPI. Scale bar: 50  $\mu$ m.

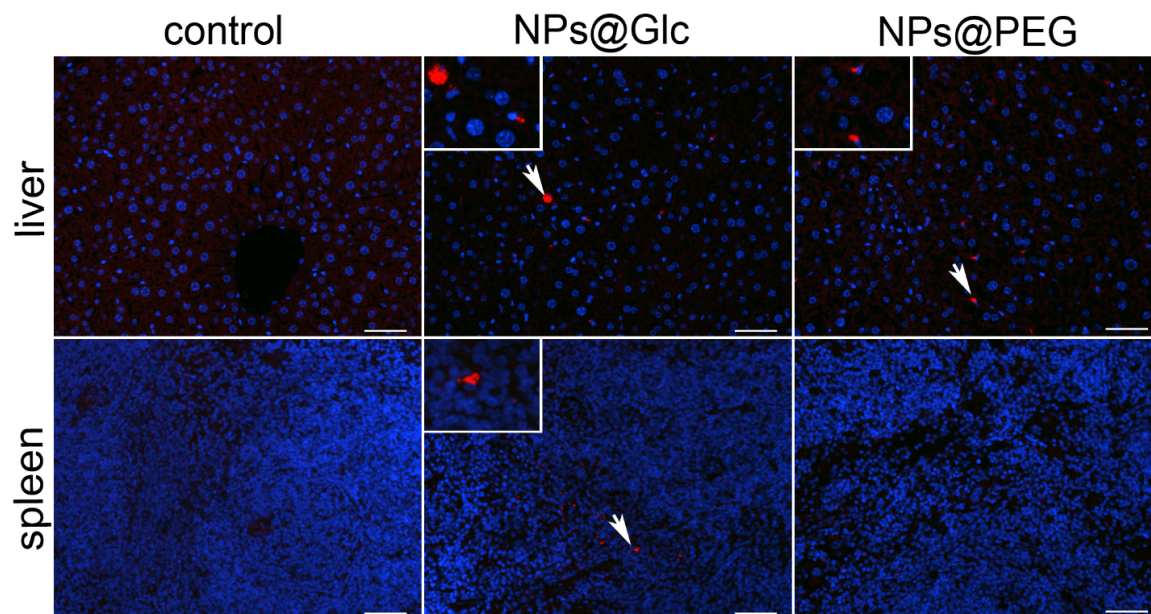

**Figure S17.** Biodistribution of NPs@Glc and NPs@PEG in mice liver and spleen tissues analyzed four months after NPs administration by fluorescence tissue examination *ex vivo*. NPs@Glc were found in the liver and spleen, whereas NPs@PEG only in the liver. Scale bar: 50  $\mu$ m.



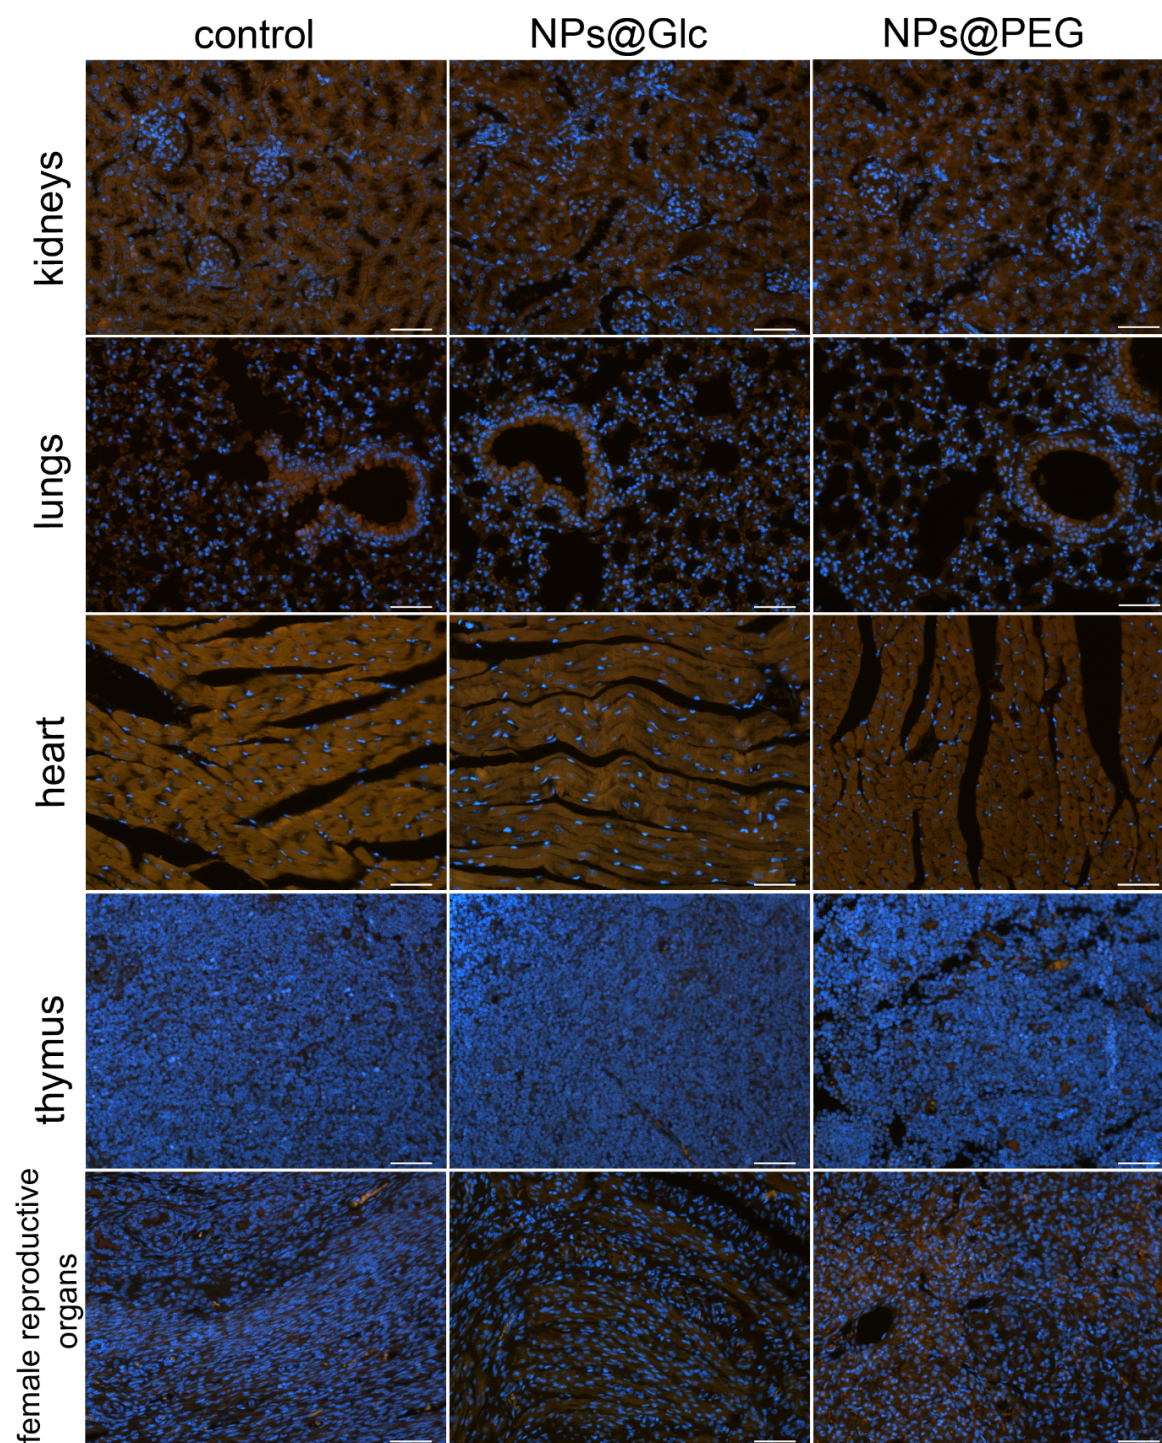

**Figure S18.** Biodistribution of NPs@Glc and NPs@PEG in mice kidneys, lungs, heart, thymus and reproductive organs, analysed four months after NPs administration by fluorescence microscopy *ex vivo*. Neither NPs@Glc nor NPs@PEG were detected in any of the mentioned organs. Scale bar: 50  $\mu\text{m}$ .



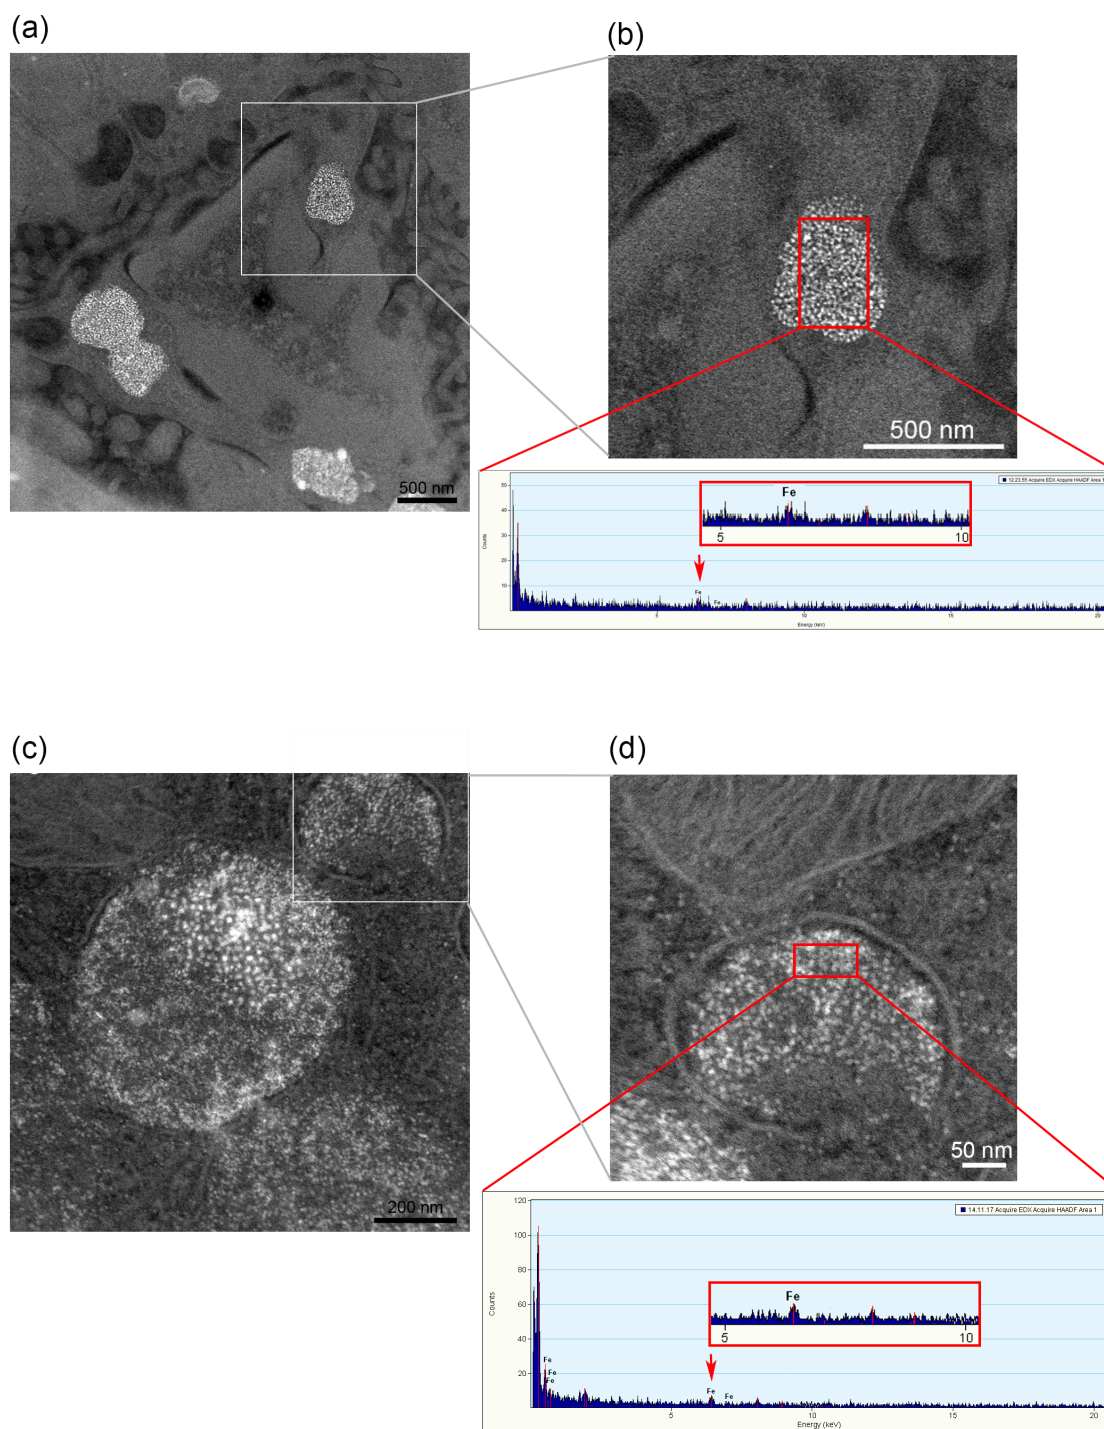

**Figure S19.** X-Ray Microanalysis (EDC) of NPs@Glc accumulated in the liver (a), (b) and spleen (c), (d) tissue. Areas restricted with white lines on micrographs (a) and (c) are enlarged on micrographs (b) and (d), respectively. The X-Ray Microanalysis spectrum corresponds to the areas restricted by red lines on micrographs (b) and (d). Iron peak corresponding to NPs is indicated by the red arrow and enlarged in a red-frame square.

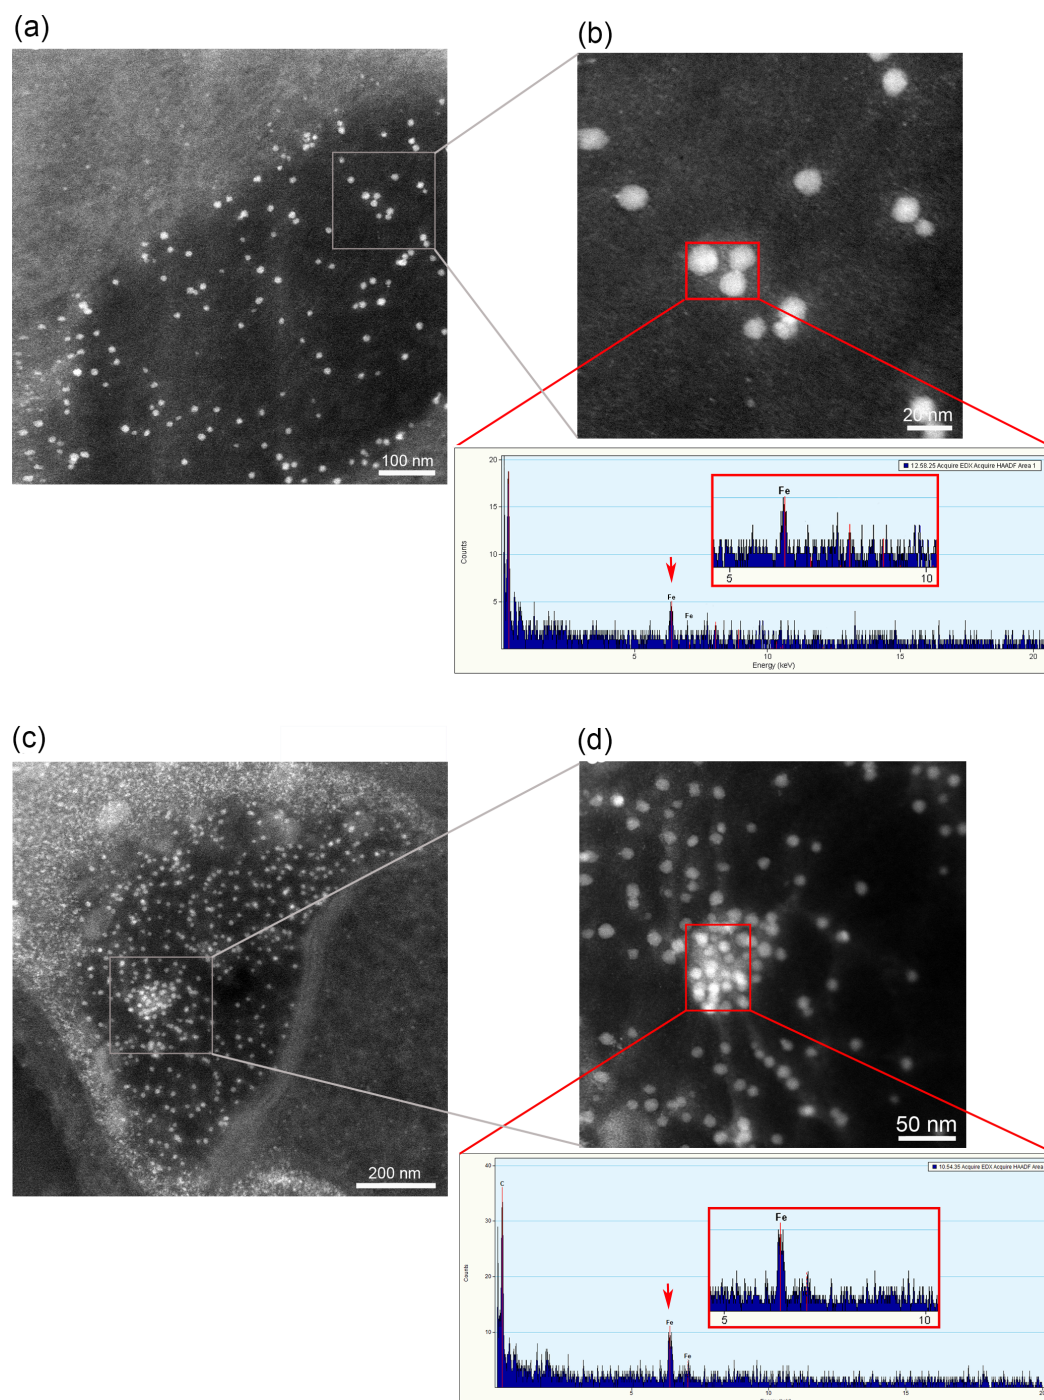

**Figure S20.** Ray Microanalysis (EDC) of NPs@PEG accumulated in the liver (a), (b) and spleen (c), (d) tissue. Areas restricted with white lines on micrographs (a) and (c) are enlarged on micrographs (b) and (d), respectively. The X-Ray Microanalysis spectrum corresponds to the areas restricted by red lines on micrographs (b) and (d), respectively. Iron peak corresponding to NPs is indicated by the red arrow and enlarged in a red-frame square.

## References:

- (1) Sun, S.; Zeng, H.; Robinson, D. B.; Raoux, S.; Rice, P. M.; Wang, S. X.; Li, G. Monodisperse  $MFe_2O_4$  ( $M = Fe, Co, Mn$ ) Nanoparticles. *J. Am. Chem. Soc.* **2004**, *126*, 273.
- (2) Moros, M.; Pelaz, B.; López-Larrubia, P.; García-Martin, M. L.; Grazú, V.; de la Fuente, J. M. Engineering biofunctional magnetic nanoparticles for biotechnological applications. *Nanoscale* **2010**, *2*, 1746.
- (3) Dias, J. T.; Moros, M.; del Pino, P.; Rivera, S.; Grazú, V.; de la Fuente, J. M. DNA as a molecular local thermal probe for the analysis of magnetic hyperthermia. *Angew. Chemie* **2013**, *125*, 11740.
- (4) Chen, J.; Wang, H.; Long, W.; Shen, X.; Wu, D.; Song, S. S.; Sun, Y. M.; Liu, P. X.; Fan, S.; Fan, F.; Zhang, X. D. Sex differences in the toxicity of polyethylene glycol-coated gold nanoparticles in mice. *Int. J. Nanomedicine* **2013**, *8*, 2409.
